# Supplementary material
Source: PubMed Central journal article supplement (PMC4267523)
Supplement: NIHMS639919-supplement.pdf [file NIHMS639919-supplement.pdf]

Figure S1

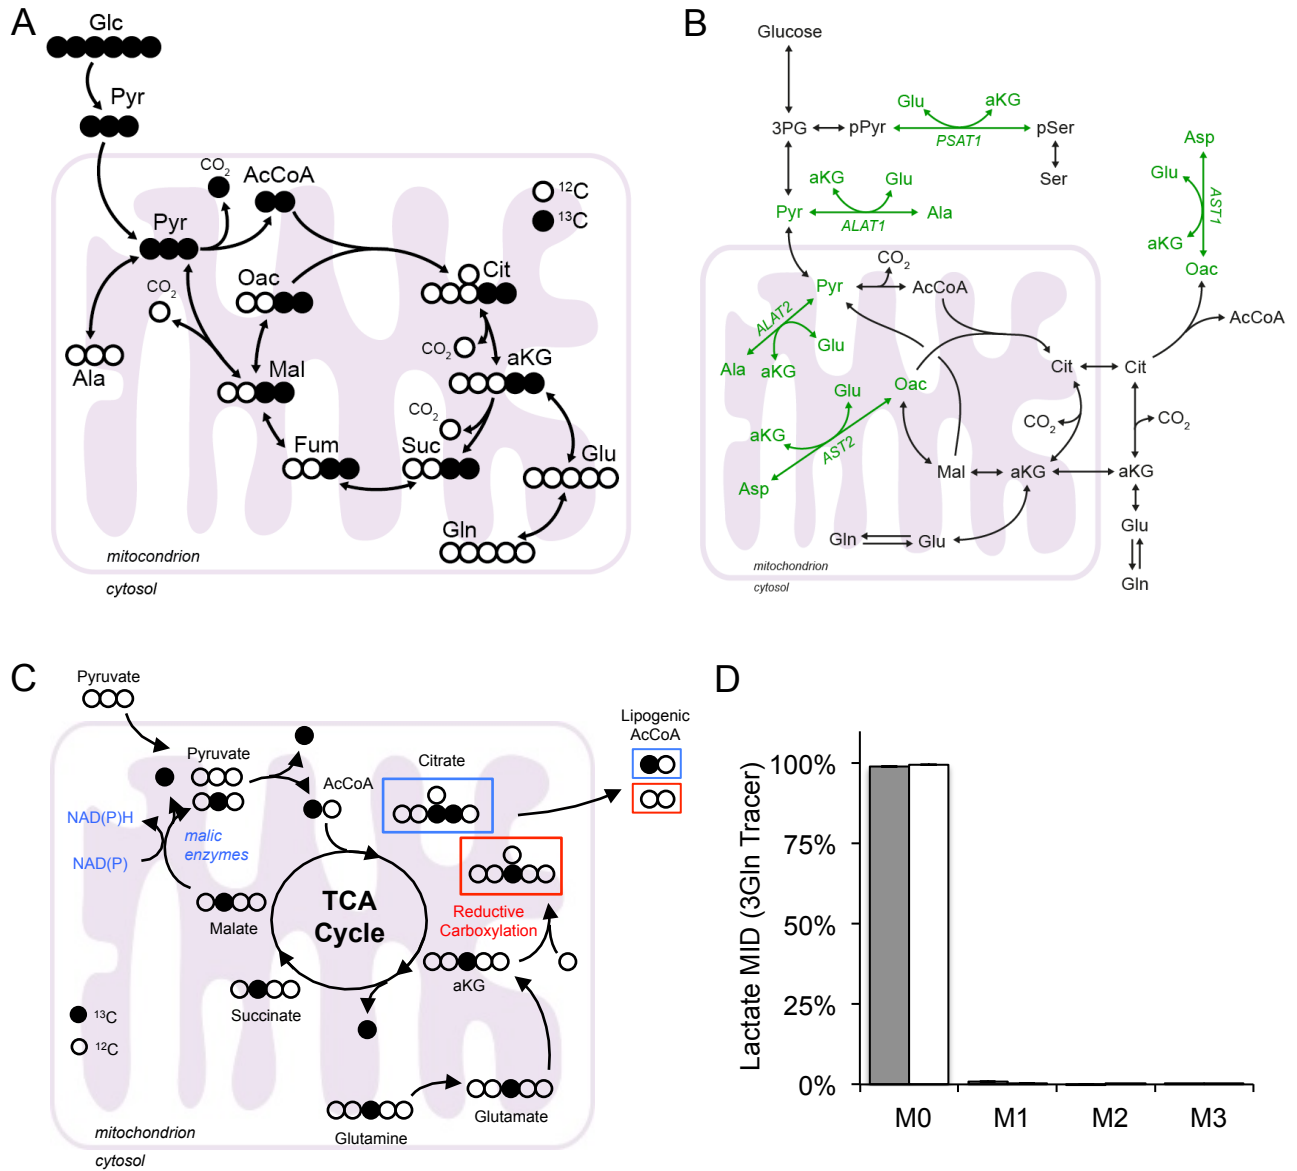

Figure S2

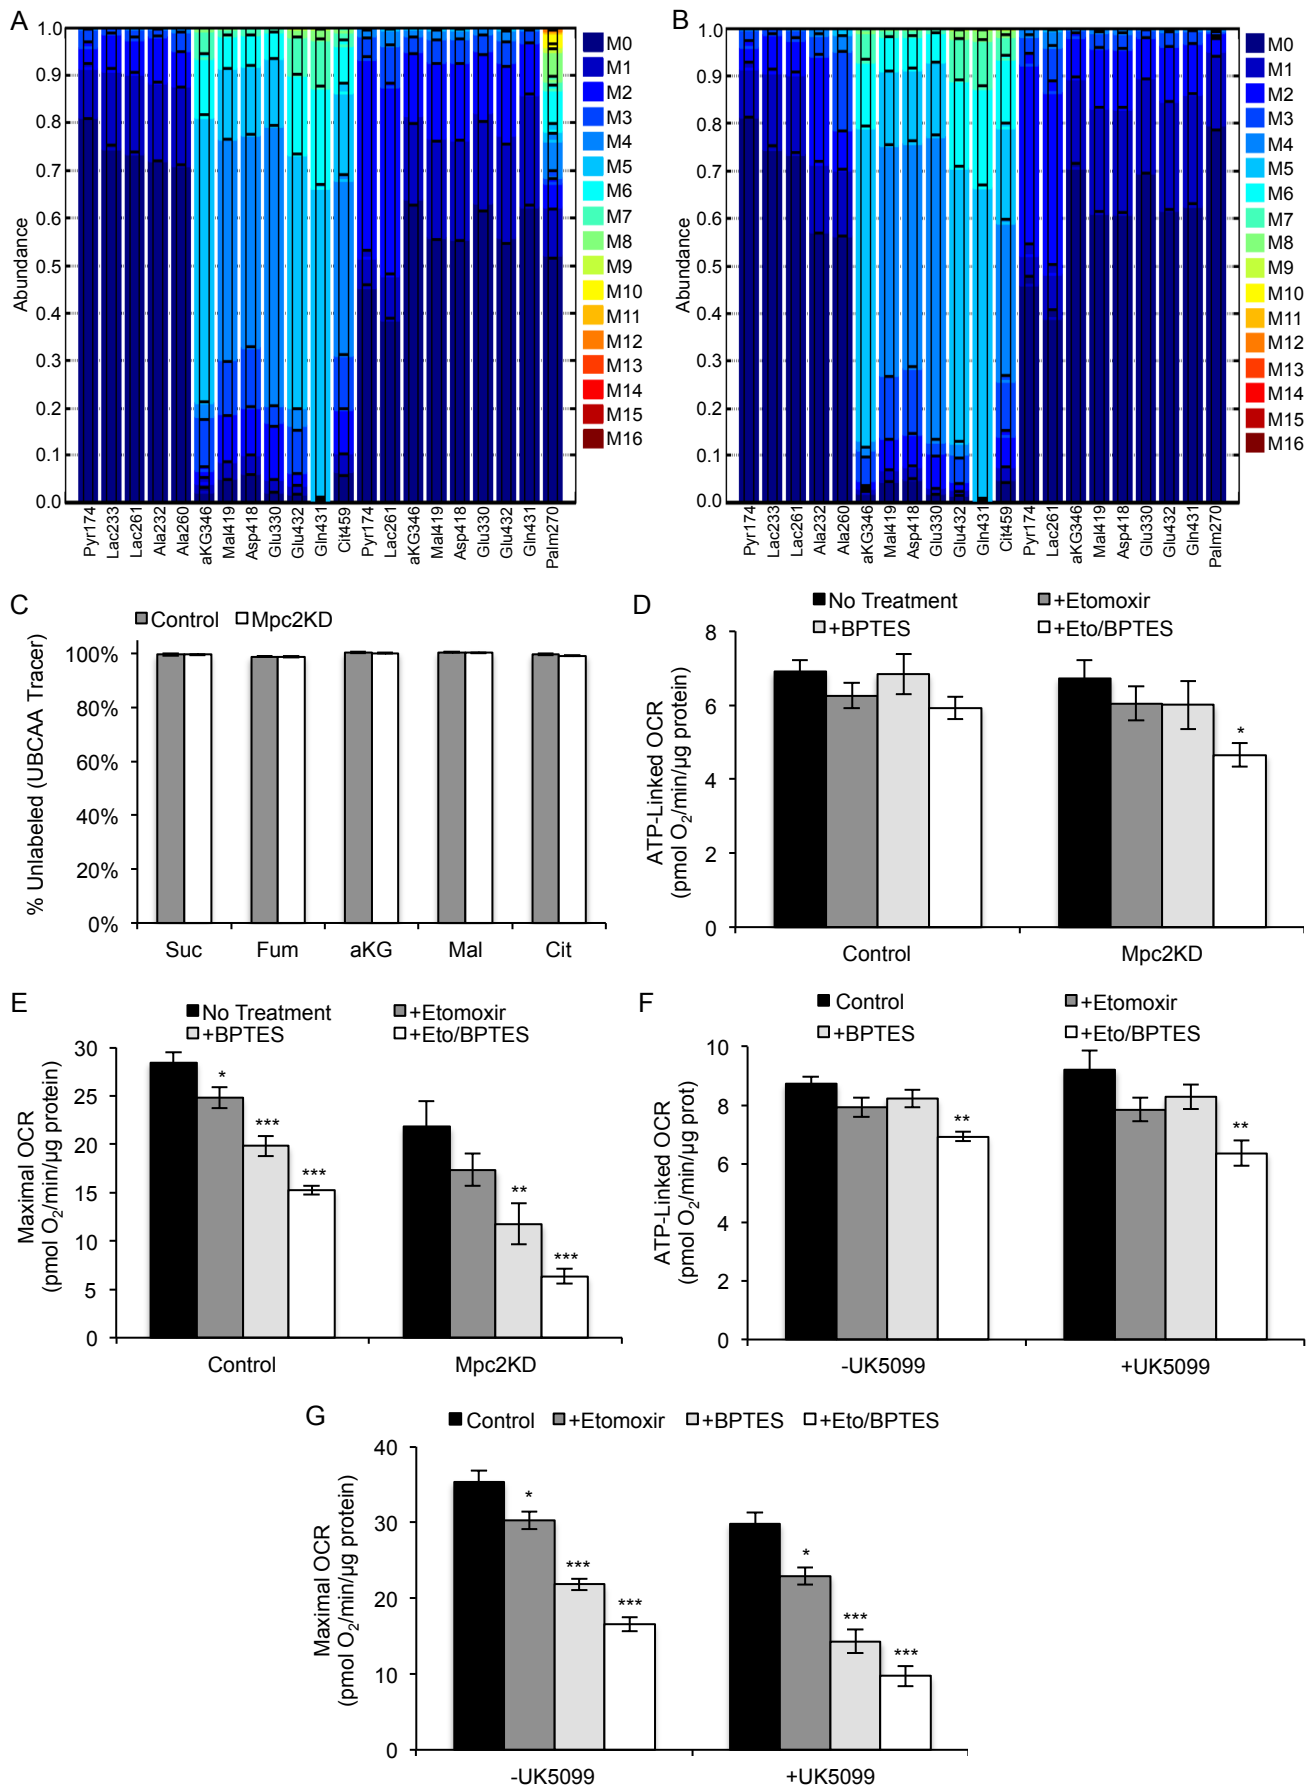

Figure S3

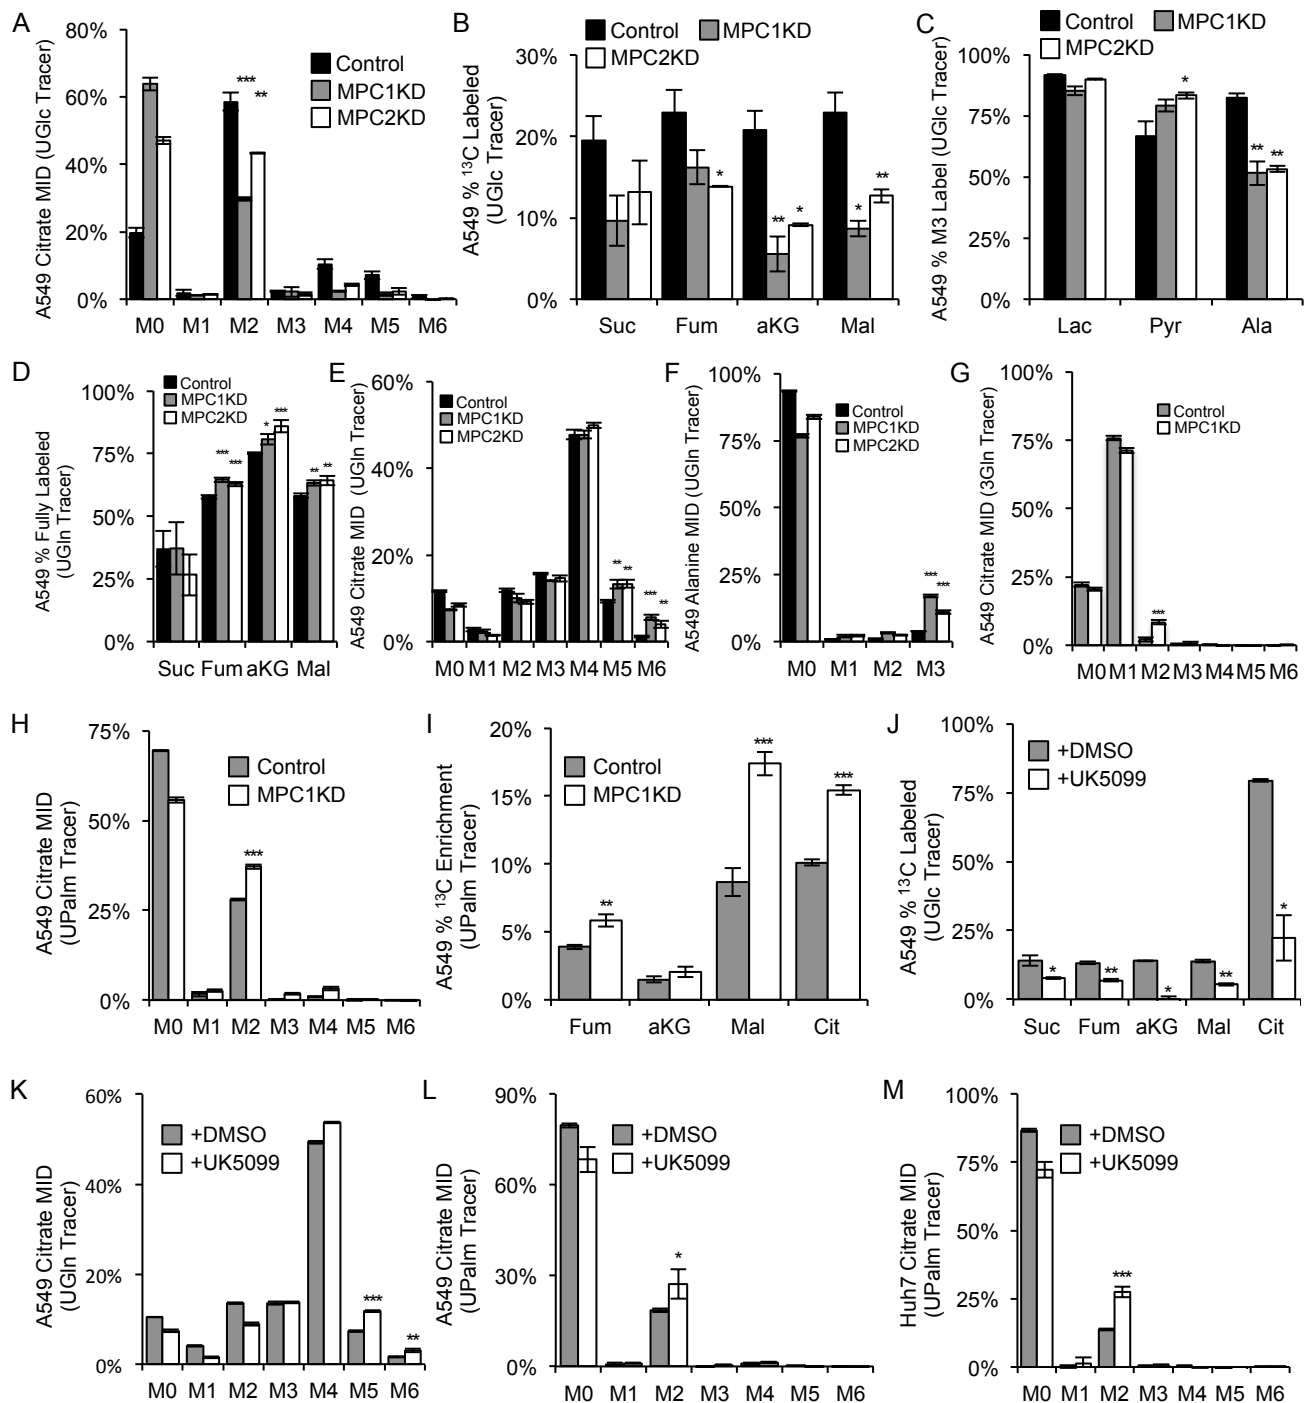

Figure S4

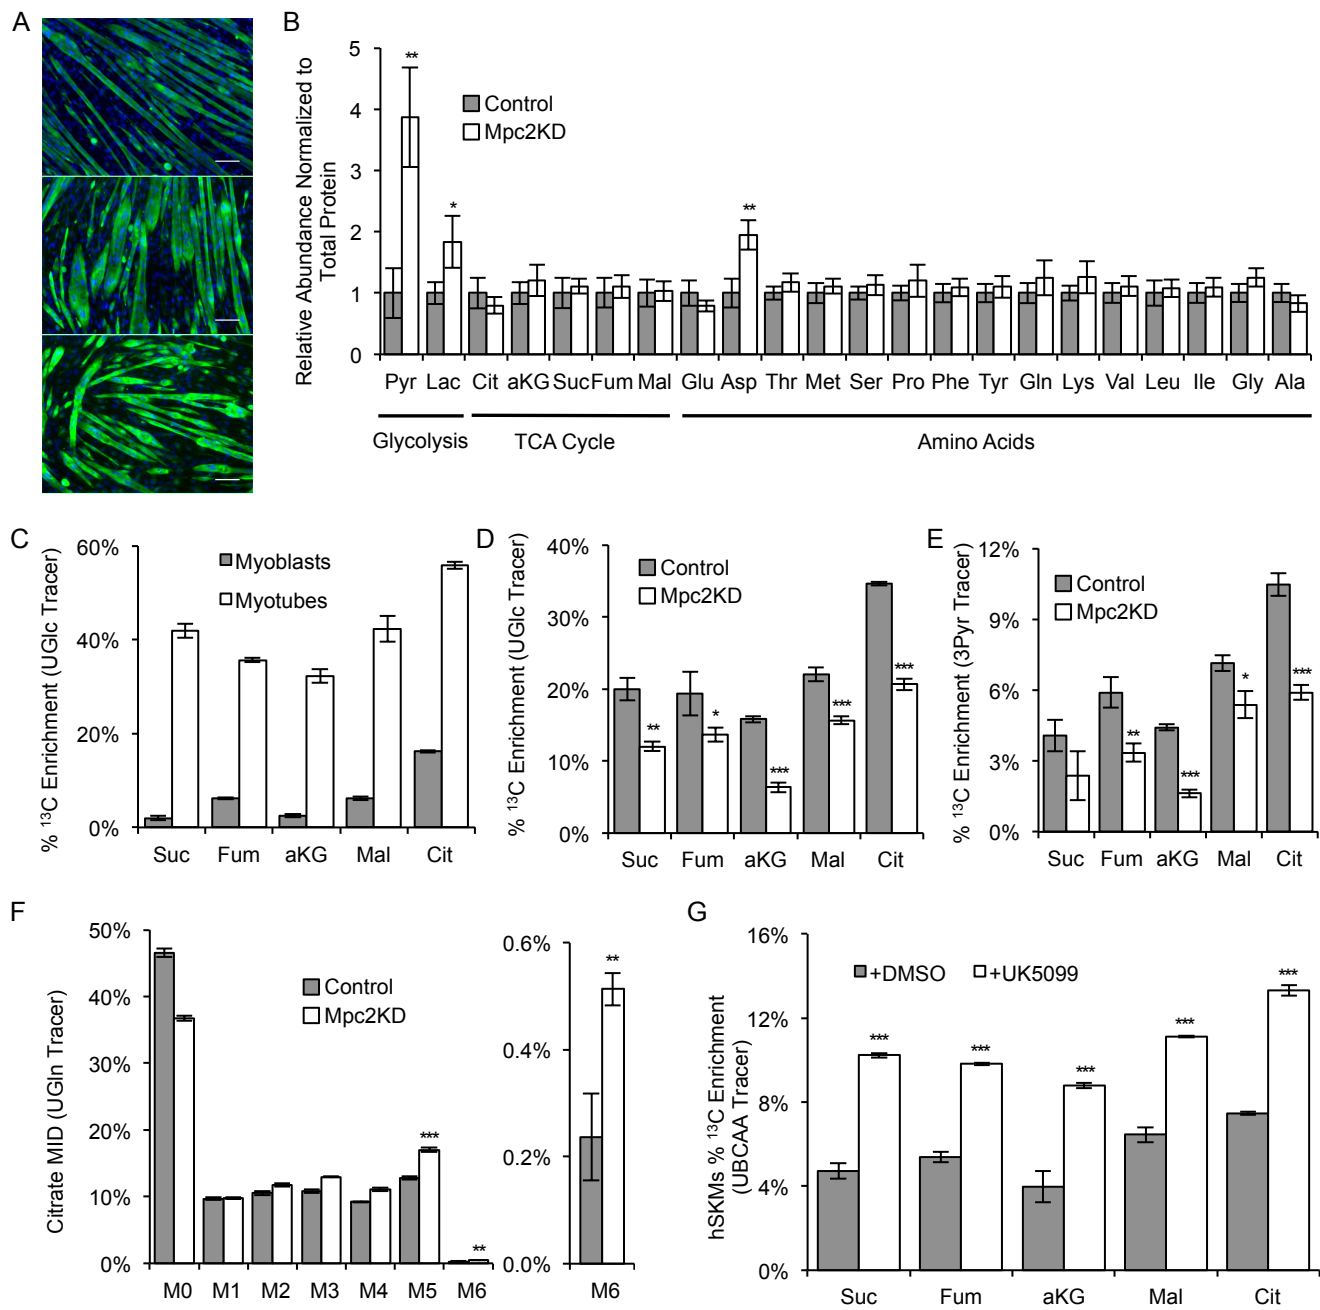

## SUPPLEMENTAL FIGURE LEGENDS

### Figure S1, related to Figure 1. Probing carbohydrate and amino acid metabolism.

(A) Schematic of UGlc derived carbon atom transitions in the TCA cycle. (B) Schematic of key amino acid metabolism pathways. (C) Schematic of 3Gln derived carbon atom transitions in the TCA cycle. (D) C2C12 myoblast lactate MID resulting from culture with [3-<sup>13</sup>C]glutamine (3Gln). Error bars indicate SD.

### Figure S2, related to Figure 3. Simulation results and C2C12 myoblast branched chain amino acid metabolism and oxygen consumption.

(A, B) Simulated MIDs overlaid with measured input MIDs for Control (A) and Mpc2KD (B) cell MFA model. Columns 1-12 and 13-21 correspond to the MIDs resulting from incubation with [U-<sup>13</sup>C<sub>5</sub>]glutamine and [1,2-<sup>13</sup>C<sub>2</sub>]glucose respectively. (C) Relative abundance of M0 mass isotopomers resulting from culture with [U-<sup>13</sup>C<sub>5</sub>]valine, [U-<sup>13</sup>C<sub>6</sub>]leucine, and [U-<sup>13</sup>C<sub>6</sub>]isoleucine (collectively UBCAA). (D) ATP-linked oxygen consumption rate (OCR). (E) Maximal OCR. (F) ATP-linked OCR. (G) Maximal OCR. Culture medium supplemented with 0.5 mM carnitine (D-G). Concentrations used: 20 μM etomoxir, 3 μM BPTES (D-G), 10 μM UK5099 (F,G). Error bars indicate SD (C), SEM (D-G). \*, \*\*, and \*\*\* indicate p<0.05, 0.01, and 0.001 respectively by ANOVA with Dunnett's post-hoc. All are C2C12 myoblasts.

### Figure S3, related to Figure 4. Human transformed cells respond to MPC inhibition.

(A-C) Citrate MID (A), % <sup>13</sup>C labeled TCA cycle intermediates (B), and M3 labeled lactate, pyruvate, and alanine (C) resulting from culture with UGlc. (D-F) % fully labeled TCA cycle intermediates (D), Citrate MID (E), and alanine MID (F) resulting from culture with UGln. (G) Citrate MID resulting from culture with 3Gln. (H, I) Citrate MID (H) and % <sup>13</sup>C enrichment of TCA cycle intermediates (I) resulting from culture with UPalm. (J) % <sup>13</sup>C labeled TCA cycle intermediates resulting from culture with UGlc, ±10 μM UK5099. (K) Citrate MID resulting from

culture with UGln,  $\pm 2 \mu\text{M}$  UK5099. (L-M) A549 (L) and Huh7 (M) cell citrate MID resulting from culture with UPalm,  $\pm 10 \mu\text{M}$  UK5099. Error bars indicate a standard deviation. \*, \*\*, and \*\*\* indicate  $p < 0.05$ ,  $0.01$ , and  $0.001$  respectively by ANOVA with Dunnett's post-hoc test (A-F) or by a two-tailed, equal variance, Student's t-test (G-M). All are A549 cells unless indicated otherwise.

**Figure S4, related to Figure 5. Myotubes respond to Mpc inhibition.**

(A) Immunofluorescent staining for desmin, a marker of differentiated myotubes, in Control (top), Mpc1KD (middle), and Mpc2KD (bottom) C2C12 cells differentiated to myotubes. Scale bar is  $100 \mu\text{m}$ . (B) Relative abundance of intracellular metabolites in C2C12 myotubes. (C) %  $^{13}\text{C}$  enrichment in C2C12 myotubes and myoblasts resulting from culture with UGlc. (D-E) C2C12 myotube %  $^{13}\text{C}$  enrichment 2 hours after incubation with UGlc (D) and 3Pyr (E). (F) Citrate MID resulting from culture of C2C12 myotubes with UGln. (G) %  $^{13}\text{C}$  enrichment in Patient 2 hSKMs cultured with with  $[\text{U-}^{13}\text{C}_5]\text{valine}$ ,  $[\text{U-}^{13}\text{C}_6]\text{leucine}$ , and  $[\text{U-}^{13}\text{C}_6]\text{isoleucine}$  (collectively UBCAA). Error bars represent a SD. \*, \*\*, and \*\*\* indicate  $p < 0.05$ ,  $0.01$ , and  $0.001$  respectively by a two-tailed, equal variance Student's t-test.

## **SUPPLEMENTAL TABLE LEGENDS**

### **Table S1, related to Figure 3A. Metabolic flux analysis on Control C2C12 myoblasts.**

Net fluxes are the differences of the forward and reverse fluxes while exchange fluxes are the magnitude of the reverse flux. If no flux type is specified, then the flux is a net flux where the reverse reaction was not included in the model.

### **Table S2, related to Figure 3A. Metabolic flux analysis on Mpc2KD C2C12 myoblasts.**

Net fluxes are the differences of the forward and reverse fluxes while exchange fluxes are the magnitude of the reverse flux. If no flux type is specified, then the flux is a net flux where the reverse reaction was not included in the model.

### **Table S3, related to Figure 3A. Metabolite fragments considered in MFA.**

"Metabolite" refers to the MOX-tBDMS derivatized metabolite that was fragmented during GC/MS analysis. "Carbons" refers to the metabolite carbons that are part of the derivatized metabolite fragment. "Formula" is the chemical formula, and m/z is the mass to charge ratio of the derivatized metabolite fragment.

**Table S1: MFA on Control C2C12 Myoblasts**

| Pathway/Reaction                              | Number and Type | Flux (fmol/cell/hr)    | Lower bound (fmol/cell/hr) | Upper bound (fmol/cell/hr) |
|-----------------------------------------------|-----------------|------------------------|----------------------------|----------------------------|
| <b>Glycolysis (net fluxes)</b>                |                 |                        |                            |                            |
| Glc.x -> G6P                                  | R1              | 320.6                  | 292.3                      | 349.1                      |
| G6P -> F6P                                    | R2 net          | 316.2                  | 287.8                      | 344.4                      |
| F6P -> DHAP + GAP                             | R3              | 316                    | 287.9                      | 344.1                      |
| DHAP -> GAP                                   | R4 net          | 316                    | 287.9                      | 344.1                      |
| GAP -> 3PG                                    | R5 net          | 631.8                  | 575.6                      | 688.6                      |
| 3PG -> PEP                                    | R6              | 631.8                  | 575.6                      | 688.6                      |
| PEP -> Pyr.c                                  | R7              | 644.4                  | 575.1                      | 701.7                      |
| Pyr.c -> Lac                                  | R8 net          | 537.8                  | 481.5                      | 595.2                      |
| Lac -> Lac.x                                  | R9              | 537.8                  | 481.5                      | 595.2                      |
| Pyr.c -> Ala                                  | R10             | 12.77                  | 4.349                      | 18.4                       |
| Pyr.m -> Ala                                  | R11             | 8.921                  | 4.688                      | 17.66                      |
| Pyr.c -> Pyr.x                                | R12             | 39.33                  | 33.88                      | 44.79                      |
| Ala -> Ala.x                                  | R13             | 9.295                  | 4.173                      | 14.42                      |
| <b>Pentose Phosphate Pathway (net fluxes)</b> |                 |                        |                            |                            |
| G6P -> P5P + CO2                              | R14             | 4.467                  | 3.511                      | 5.424                      |
| P5P + P5P -> S7P + GAP                        | R15 net         | -0.1144                | -0.4894                    | 0.2597                     |
| S7P + GAP -> F6P + E4P                        | R16 net         | -0.1144                | -0.4894                    | 0.2597                     |
| P5P + E4P -> F6P + GAP                        | R17 net         | -0.1144                | -0.4894                    | 0.2597                     |
| <b>Anaplerotic Reactions (net fluxes)</b>     |                 |                        |                            |                            |
| Pyr.c -> Pyr.m                                | R18             | 54.5                   | 47.35                      | 64.18                      |
| Pyr.m + CO2 -> Oac.m                          | R19             | 2.531                  | 1.946                      | 3.208                      |
| Oac.c -> PEP + CO2                            | R20             | 12.63                  | 0                          | 17.66                      |
| Mal.m -> Pyr.m + CO2                          | R21             | 4.974                  | 2.562                      | 7.502                      |
| Mal.c -> Pyr.c + CO2                          | R22             | $1.00 \times 10^{-7}$  | 0                          | 17.64                      |
| Pyr.m -> AcCoA.m + CO2                        | R23             | 48.02                  | 41.94                      | 54.41                      |
| FAO -> AcCoA.m                                | R24             | 7.747                  | 5.092                      | 10.58                      |
| Glu -> Akg                                    | R25 net         | 21.04                  | 17.63                      | 24.53                      |
| Gln -> Glu                                    | R26 net         | 31.8                   | 28.23                      | 35.45                      |
| Gln.x -> Gln                                  | R27             | 38.45                  | 34.51                      | 42.44                      |
| Glu -> Glu.x                                  | R28             | 3.001                  | 2.586                      | 3.416                      |
| <b>TCA Cycle (net fluxes)</b>                 |                 |                        |                            |                            |
| AcCoA.m + Oac.m -> Cit                        | R29             | 55.77                  | 49.31                      | 62.38                      |
| Cit -> Akg + CO2                              | R30 net         | 5.042                  | 2.806                      | 6.283                      |
| Akg -> Suc + CO2                              | R31             | 26.08                  | 22.23                      | 30.16                      |
| Suc -> Fum.m                                  | R32 net         | 26.08                  | 22.23                      | 30.16                      |
| Fum.m -> Mal.m                                | R33 net         | 26.08                  | 22.23                      | 30.16                      |
| Mal.m -> Oac.m                                | R34 net         | 24.51                  | -46.77                     | 79.13                      |
| Oac.m -> Asp.m                                | R35 net         | -28.73                 | -100.7                     | 26.37                      |
| Mal.c -> Oac.c                                | R36 net         | -3.4                   | -70.26                     | $\infty$                   |
| Oac.c -> Asp.c                                | R37 net         | 34.7                   | -18.28                     | $\infty$                   |
| Asp.c -> Fum.c                                | R38             | $1.00 \times 10^{-7}$  | $-1.02 \times 10^{-10}$    | $\infty$                   |
| Mal.c -> Fum.c                                | R39 net         | $-1.00 \times 10^{-7}$ | $-\infty$                  | 0                          |
| Mal.c -> Mal.m                                | R40 net         | 3.4                    | -68.51                     | 57.39                      |
| Asp.m -> Asp.c                                | R41 net         | -28.73                 | -100.7                     | 26.37                      |



**Biomass**

|                                                                                                               |     |                       |       |         |
|---------------------------------------------------------------------------------------------------------------|-----|-----------------------|-------|---------|
| Cit -> AcCoA.c + Oac.c                                                                                        | R42 | 50.72                 | 44.62 | 56.98   |
| 0*AcCoA.c + 0*AcCoA.c + 0*AcCoA.c +<br>0*AcCoA.c + 0*AcCoA.c + 0*AcCoA.c +<br>0*AcCoA.c + 0*AcCoA.c -> Palm.s | R43 | 1.30×10 <sup>-5</sup> | 0     | ∞       |
| Palm.d -> Palm.s                                                                                              | R44 | 2.14×10 <sup>-5</sup> | 0     | ∞       |
| 114*Asp.c + 152*Glu + 237*Ala +<br>127*Gln + 970*AcCoA.c + 92*P5P -><br>Biomass                               | R45 | 0.05229               | 0.046 | 0.05874 |

**Dilution/Mixing**

|                    |     |                       |                       |        |
|--------------------|-----|-----------------------|-----------------------|--------|
| 0*Pyr.c -> Pyr.mnt | R46 | 0.5438                | 0.09823               | 0.7485 |
| 0*Pyr.m -> Pyr.mnt | R47 | 0.4562                | 0.2515                | 0.9018 |
| 0*Mal.c -> Mal.mnt | R48 | 1.00×10 <sup>-7</sup> | 5.00×10 <sup>-8</sup> | 1      |
| 0*Mal.m -> Mal.mnt | R49 | 1                     | 0                     | 1      |
| 0*Asp.c -> Asp.mnt | R50 | 0.004925              | 5.00×10 <sup>-8</sup> | 1      |
| 0*Asp.m -> Asp.mnt | R51 | 0.9951                | 0                     | 1      |
| 0*Fum.m -> Fum.mnt | R52 | 0.8233                | 5.00×10 <sup>-8</sup> | 1      |
| 0*Fum.c -> Fum.mnt | R53 | 0.1767                | 0                     | 1      |
| Glu.d -> Glu       | R54 | 0.1747                | 0                     | 0.588  |
| Pyr.mnt -> Pyr.fix | R55 | 1                     | 1                     | 1      |
| Asp.mnt -> Asp.fix | R56 | 1                     | 1                     | 1      |
| Mal.mnt -> Mal.fix | R57 | 1                     | 1                     | 1      |
| Fum.mnt -> Fum.fix | R58 | 1                     | 1                     | 1      |

**Glycolysis (exchange fluxes)**

|              |         |                       |   |   |
|--------------|---------|-----------------------|---|---|
| G6P <- F6P   | R2 exch | 9.99×10 <sup>-8</sup> | 0 | ∞ |
| DHAP <- GAP  | R4 exch | 1.00×10 <sup>7</sup>  | 0 | ∞ |
| GAP <- 3PG   | R5 exch | 5.77×10 <sup>5</sup>  | 0 | ∞ |
| Pyr.c <- Lac | R8 exch | 4.33×10 <sup>5</sup>  | 0 | ∞ |

**Pentose Phosphate Pathway (exchange fluxes)**

|                        |          |                      |        |   |
|------------------------|----------|----------------------|--------|---|
| P5P + P5P <- S7P + GAP | R15 exch | 1.00×10 <sup>7</sup> | 0.7823 | ∞ |
| S7P + GAP <- F6P + E4P | R16 exch | 3.184                | 0.801  | ∞ |
| P5P + E4P <- F6P + GAP | R17 exch | 7.56×10 <sup>5</sup> | 0      | ∞ |

**Anaplerotic Reactions (exchange fluxes)**

|            |          |       |       |       |
|------------|----------|-------|-------|-------|
| Glu <- Akg | R25 exch | 1756  | 354.1 | ∞     |
| Gln <- Glu | R26 exch | 1.227 | 0     | 5.287 |

**TCA Cycle (exchange fluxes)**

|                  |          |                       |       |       |
|------------------|----------|-----------------------|-------|-------|
| Cit <- Akg + CO2 | R30 exch | 5.65                  | 4.556 | 7.607 |
| Suc <- Fum.m     | R32 exch | 0.4795                | 0     | ∞     |
| Fum.m <- Mal.m   | R33 exch | 1.00×10 <sup>-7</sup> | 0     | ∞     |
| Mal.m <- Oac.m   | R34 exch | 1.00×10 <sup>-7</sup> | 0     | 49.8  |
| Oac.m <- Asp.m   | R35 exch | 6.627                 | 0     | ∞     |
| Mal.c <- Oac.c   | R36 exch | 1.58×10 <sup>6</sup>  | 0     | ∞     |
| Oac.c <- Asp.c   | R37 exch | 1.00×10 <sup>-7</sup> | 0     | ∞     |
| Mal.c <- Fum.c   | R39 exch | 5.63×10 <sup>5</sup>  | 0     | ∞     |
| Mal.c <- Mal.m   | R40 exch | 118.1                 | 13.26 | ∞     |
| Asp.m <- Asp.c   | R41 exch | 1.00×10 <sup>-7</sup> | 0     | ∞     |

SSE = 80.4

Expected SSE = [73.1 174.0] (99.9% conf., 117 DOF)

**Table S2: MFA on Mpc2KD C2C12 Myoblasts**

| Pathway/Reaction                              | Number and Type | Flux (fmol/cell/hr)    | Lower bound (fmol/cell/hr) | Upper bound (fmol/cell/hr) |
|-----------------------------------------------|-----------------|------------------------|----------------------------|----------------------------|
| <b>Glycolysis (net fluxes)</b>                |                 |                        |                            |                            |
| Glc.x -> G6P                                  | R1              | 424.2                  | 387.9                      | 460.6                      |
| G6P -> F6P                                    | R2 net          | 420.4                  | 384                        | 456.9                      |
| F6P -> DHAP + GAP                             | R3              | 419.8                  | 383.4                      | 456.2                      |
| DHAP -> GAP                                   | R4 net          | 419.8                  | 383.4                      | 456.2                      |
| GAP -> 3PG                                    | R5 net          | 839.3                  | 766.6                      | 912                        |
| 3PG -> PEP                                    | R6              | 839.3                  | 766.6                      | 912                        |
| PEP -> Pyr.c                                  | R7              | 855.3                  | 766.6                      | 928.4                      |
| Pyr.c -> Lac                                  | R8 net          | 611.6                  | 539.6                      | 683.4                      |
| Lac -> Lac.x                                  | R9              | 611.6                  | 539.6                      | 683.4                      |
| Pyr.c -> Ala                                  | R10             | 9.877                  | 8.258                      | 11.24                      |
| Pyr.m -> Ala                                  | R11             | 6.407                  | 5.272                      | 8.178                      |
| Pyr.c -> Pyr.x                                | R12             | 222.7                  | 191.8                      | 253.6                      |
| Ala -> Ala.x                                  | R13             | 4.091                  | 2.985                      | 5.199                      |
| <b>Pentose Phosphate Pathway (net fluxes)</b> |                 |                        |                            |                            |
| G6P -> P5P + CO2                              | R14             | 3.836                  | 0.9028                     | 6.762                      |
| P5P + P5P -> S7P + GAP                        | R15 net         | -0.2981                | -1.294                     | 0.697                      |
| S7P + GAP -> F6P + E4P                        | R16 net         | -0.2981                | -1.294                     | 0.697                      |
| P5P + E4P -> F6P + GAP                        | R17 net         | -0.2981                | -1.294                     | 0.697                      |
| <b>Anaplerotic Reactions (net fluxes)</b>     |                 |                        |                            |                            |
| Pyr.c -> Pyr.m                                | R18             | 11.11                  | 8.024                      | 16.43                      |
| Pyr.m + CO2 -> Oac.m                          | R19             | 6.553                  | 4.699                      | 9.848                      |
| Oac.c -> PEP + CO2                            | R20             | 16.04                  | 0                          | 22.21                      |
| Mal.m -> Pyr.m + CO2                          | R21             | 19.53                  | 15.97                      | 23.5                       |
| Mal.c -> Pyr.c + CO2                          | R22             | $1.00 \times 10^{-7}$  | 0                          | 22.24                      |
| Pyr.m -> AcCoA.m + CO2                        | R23             | 17.68                  | 14.18                      | 22.4                       |
| FAO -> AcCoA.m                                | R24             | 34.79                  | 29.97                      | 39.42                      |
| Glu -> Akg                                    | R25 net         | 34.88                  | 29.71                      | 40.29                      |
| Gln -> Glu                                    | R26 net         | 45.58                  | 40.31                      | 51.01                      |
| Gln.x -> Gln                                  | R27             | 52.11                  | 46.56                      | 57.75                      |
| Glu -> Glu.x                                  | R28             | 3.797                  | 3.271                      | 4.32                       |
| <b>TCA Cycle (net fluxes)</b>                 |                 |                        |                            |                            |
| AcCoA.m + Oac.m -> Cit                        | R29             | 52.47                  | 46.49                      | 58.59                      |
| Cit -> Akg + CO2                              | R30 net         | 2.594                  | 1.178                      | 4.276                      |
| Akg -> Suc + CO2                              | R31             | 37.47                  | 31.66                      | 43.69                      |
| Suc -> Fum.m                                  | R32 net         | 37.47                  | 31.66                      | 43.69                      |
| Fum.m -> Mal.m                                | R33 net         | 37.47                  | 31.66                      | 43.69                      |
| Mal.m -> Oac.m                                | R34 net         | 46.52                  | -99.13                     | 129.7                      |
| Oac.m -> Asp.m                                | R35 net         | 0.602                  | -144.3                     | 85.74                      |
| Mal.c -> Oac.c                                | R36 net         | -28.58                 | -129.4                     | 116.6                      |
| Oac.c -> Asp.c                                | R37 net         | 5.266                  | -79.92                     | 433                        |
| Asp.c -> Fum.c                                | R38             | $1.00 \times 10^{-7}$  | 0                          | $\infty$                   |
| Mal.c -> Fum.c                                | R39 net         | $-1.00 \times 10^{-7}$ | $-\infty$                  | 0                          |
| Mal.c -> Mal.m                                | R40 net         | 28.58                  | -116.6                     | 112.3                      |
| Asp.m -> Asp.c                                | R41 net         | 0.602                  | -144.3                     | 85.74                      |

**Biomass**

|                                                                                                               |     |         |                       |                      |
|---------------------------------------------------------------------------------------------------------------|-----|---------|-----------------------|----------------------|
| Cit -> AcCoA.c + Oac.c                                                                                        | R42 | 49.88   | 43.88                 | 55.97                |
| 0*AcCoA.c + 0*AcCoA.c + 0*AcCoA.c +<br>0*AcCoA.c + 0*AcCoA.c + 0*AcCoA.c +<br>0*AcCoA.c + 0*AcCoA.c -> Palm.s | R43 | 0.09072 | 0                     | 3.20×10 <sup>6</sup> |
|                                                                                                               | R44 | 0.9542  | 3.13×10 <sup>-7</sup> | ∞                    |
| 114*Asp.c + 152*Glu + 237*Ala +<br>127*Gln + 970*AcCoA.c + 92*P5P -><br>Biomass                               | R45 | 0.05142 | 0.04523               | 0.0577               |

**Dilution/Mixing**

|                    |     |         |                       |         |
|--------------------|-----|---------|-----------------------|---------|
| 0*Pyr.c -> Pyr.mnt | R46 | 0.9447  | 0.9159                | 0.9699  |
| 0*Pyr.m -> Pyr.mnt | R47 | 0.05533 | 0.03005               | 0.08414 |
| 0*Mal.c -> Mal.mnt | R48 | 0.613   | 5.00×10 <sup>-8</sup> | 1       |
| 0*Mal.m -> Mal.mnt | R49 | 0.387   | 0                     | 1       |
| 0*Asp.c -> Asp.mnt | R50 | 0.04039 | 5.00×10 <sup>-8</sup> | 1       |
| 0*Asp.m -> Asp.mnt | R51 | 0.9596  | 0                     | 1       |
| 0*Fum.m -> Fum.mnt | R52 | 0.5044  | 5.00×10 <sup>-8</sup> | 1       |
| 0*Fum.c -> Fum.mnt | R53 | 0.4956  | 0                     | 1       |
| Glu.d -> Glu       | R54 | 0.9037  | 0.4202                | 1.407   |
| Pyr.mnt -> Pyr.fix | R55 | 1       | 1                     | 1       |
| Asp.mnt -> Asp.fix | R56 | 1       | 1                     | 1       |
| Mal.mnt -> Mal.fix | R57 | 1       | 1                     | 1       |
| Fum.mnt -> Fum.fix | R58 | 1       | 1                     | 1       |

**Glycolysis (exchange fluxes)**

|              |         |                       |   |   |
|--------------|---------|-----------------------|---|---|
| G6P <- F6P   | R2 exch | 1.00×10 <sup>-7</sup> | 0 | ∞ |
| DHAP <- GAP  | R4 exch | 1.00×10 <sup>-7</sup> | 0 | ∞ |
| GAP <- 3PG   | R5 exch | 0.04608               | 0 | ∞ |
| Pyr.c <- Lac | R8 exch | 1.00×10 <sup>-7</sup> | 0 | ∞ |

**Pentose Phosphate Pathway (exchange fluxes)**

|                        |          |                      |       |       |
|------------------------|----------|----------------------|-------|-------|
| P5P + P5P <- S7P + GAP | R15 exch | 1.00×10 <sup>7</sup> | 7.084 | ∞     |
| S7P + GAP <- F6P + E4P | R16 exch | 10.62                | 7.084 | 33.17 |
| P5P + E4P <- F6P + GAP | R17 exch | 9.92×10 <sup>5</sup> | 30.13 | ∞     |

**Anaplerotic Reactions (exchange fluxes)**

|            |          |       |       |       |
|------------|----------|-------|-------|-------|
| Glu <- Akg | R25 exch | 5677  | 271.4 | ∞     |
| Gln <- Glu | R26 exch | 3.357 | 0     | 15.52 |

**TCA Cycle (exchange fluxes)**

|                  |          |                       |       |       |
|------------------|----------|-----------------------|-------|-------|
| Cit <- Akg + CO2 | R30 exch | 6.172                 | 4.836 | 7.573 |
| Suc <- Fum.m     | R32 exch | 0.05958               | 0     | ∞     |
| Fum.m <- Mal.m   | R33 exch | 1.00×10 <sup>-7</sup> | 0     | ∞     |
| Mal.m <- Oac.m   | R34 exch | 1.00×10 <sup>-7</sup> | 0     | 87.45 |
| Oac.m <- Asp.m   | R35 exch | 1.00×10 <sup>-7</sup> | 0     | ∞     |
| Mal.c <- Oac.c   | R36 exch | 1.00×10 <sup>7</sup>  | 97    | ∞     |
| Oac.c <- Asp.c   | R37 exch | 1.00×10 <sup>-7</sup> | 0     | ∞     |
| Mal.c <- Fum.c   | R39 exch | 1.00×10 <sup>-7</sup> | 0     | ∞     |
| Mal.c <- Mal.m   | R40 exch | 123.7                 | 36.07 | ∞     |
| Asp.m <- Asp.c   | R41 exch | 273.1                 | 0     | ∞     |

SSE = 82.5

Expected SSE = [61.4 155.6] (99.9% conf., 102 DOF)

**Table S3. Metabolite Fragments Considered in MFA**

| <b>Metabolite</b> | <b>Carbons</b> | <b>Formula</b>                                                                | <b>m/z</b> |
|-------------------|----------------|-------------------------------------------------------------------------------|------------|
| Pyruvate          | 1,2,3          | C <sub>6</sub> H <sub>12</sub> O <sub>3</sub> NSi                             | 174        |
| Lactate           | 2,3            | C <sub>10</sub> H <sub>25</sub> O <sub>2</sub> Si <sub>2</sub>                | 233        |
| Lactate           | 1,2,3          | C <sub>11</sub> H <sub>25</sub> O <sub>3</sub> Si <sub>2</sub>                | 261        |
| Alanine           | 2,3            | C <sub>10</sub> H <sub>26</sub> ONSi <sub>2</sub>                             | 232        |
| Alanine           | 1,2,3          | C <sub>11</sub> H <sub>26</sub> O <sub>2</sub> NSi <sub>2</sub>               | 260        |
| aKG               | 1,2,3,4,5      | C <sub>14</sub> H <sub>28</sub> O <sub>5</sub> NSi <sub>2</sub>               | 346        |
| Malate            | 1,2,3,4        | C <sub>18</sub> H <sub>39</sub> O <sub>5</sub> Si <sub>3</sub>                | 419        |
| Aspartate         | 1,2,3,4        | C <sub>18</sub> H <sub>40</sub> O <sub>4</sub> NSi <sub>3</sub>               | 418        |
| Glutamate         | 2,3,4,5        | C <sub>16</sub> H <sub>36</sub> O <sub>2</sub> NSi <sub>2</sub>               | 330        |
| Glutamate         | 1,2,3,4,5      | C <sub>19</sub> H <sub>42</sub> O <sub>4</sub> NSi <sub>3</sub>               | 432        |
| Glutamine         | 1,2,3,4,5      | C <sub>19</sub> H <sub>43</sub> O <sub>3</sub> N <sub>2</sub> Si <sub>3</sub> | 431        |
| Citrate           | 1,2,3,4,5,6    | C <sub>20</sub> H <sub>39</sub> O <sub>6</sub> Si <sub>3</sub>                | 459        |
| Palmitate         | 1-16           | C <sub>17</sub> H <sub>34</sub> O <sub>2</sub>                                | 270        |

## SUPPLEMENTAL EXPERIMENTAL PROCEDURES

### Metabolic Flux Analysis Assumptions

1. Metabolism and isotopic labeling were at steady state.
2. Cells were assumed to grow exponentially.
3. Labeled CO<sub>2</sub> formed did not reincorporate in carboxylation reactions.
4. Protein turnover occurred at a negligible rate compared to glucose and glutamine consumption.
5. Pyruvate, acetyl-CoA, oxaloacetate, malate, fumarate, and aspartate existed in cytosolic and mitochondrial pools. Malate, and aspartate were allowed to exchange freely between the compartments.
6. The relative flux of glucose through the pentose phosphate pathway vs. glycolysis was assumed to be the M1/(M1+M2) ratio of lactate <sup>13</sup>C abundances resulting from culture of C2C12 cells with [1,2-<sup>13</sup>C<sub>2</sub>]glucose.
7. The per cell biomass requirements of proliferating C2C12 myoblasts were similar to those reported previously (Grassian et al., 2014).

### Determination of Extracellular Fluxes

Initial and final quantities of glucose, lactate, glutamine, and glutamate present were determined using a Yellow Springs Instrument while pyruvate and alanine levels were measured using GC/MS. The extracellular fluxes, in units of fmol/cell/hour, were determined by solving the differential equations listed as Equations S1-S3:

$$\frac{dX}{dt} = \mu X \quad (\text{S1})$$

$$\frac{dN_i}{dt} = q_i X \quad (\text{S2})$$

$$\frac{dN_{Gln}}{dt} = q_i X - kN_{Gln} \quad (\text{S3})$$

where  $X$  represents the number of cells present,  $\mu$  the cellular growth rate (in  $\text{hr}^{-1}$ ),  $N_i$  the moles of substrate  $i$  present,  $q_i$  the extracellular flux of substrate  $i$  (in moles/cell/hr), and  $k$  the degradation rate of glutamine (in  $\text{hr}^{-1}$ ). Equations S1 and S2 were used to solve for glucose, lactate, glutamate, pyruvate, and alanine extracellular fluxes while Equations S1 and S3 (which considers glutamine degradation) were used to solve for the glutamine extracellular flux.  $k$  was set to  $0.0045 \text{ hr}^{-1}$  (Tritsch and Moore, 1962). Solving Equations S1-S3 yields Equations S4-S6 respectively.

$$X = X_0 e^{\mu t} \quad (\text{S4})$$

$$q_i = \frac{\mu(N_{i,f} - N_{i,0})}{X - X_0} \quad (\text{S5})$$

$$q_{Gln} = \frac{N_{Gln,f} - N_{Gln,0} e^{-kt}}{\left(\frac{1}{\mu + k}\right)(X - X_0 e^{-kt})} \quad (\text{S6})$$

where the subscripts  $0$  and  $f$  indicate initial and final values respectively.

### Separation and Chemical Derivatization of Polar Metabolites and Fatty Acids

Fatty acid methyl esters (FAMES) were formed from the extracted fatty acids by adding  $500\mu\text{L}$  of 2%  $\text{H}_2\text{SO}_4$  in methanol to the dried contents of the non-polar layer and heating at  $50^\circ\text{C}$  for at least two hours. FAMES were extracted from the solution by washing with  $100\mu\text{L}$  of a saturated NaCl solution and  $500\mu\text{L}$  of hexane. The hexane layer was removed, evaporated and re-dissolved with  $40\mu\text{L}$  of hexane for injection.

Dried polar metabolites were dissolved in  $15 \mu\text{L}$  of 2% (m/v) methoxyamine hydrochloride in pyridine and incubated for 60 minutes at  $37^\circ\text{C}$ .  $20 \mu\text{L}$  of N-tert-butyldimethylsilyl-n-methyltrifluoroacetamide with 1% tert-butyldimethylchlorosilane was then added and the solution incubated at  $37^\circ\text{C}$  for an additional 30 minutes to form methoxyamine-tert-butyldimethylsilyl (MOX-tBDMS) derivatives.

### Gas Chromatography and Mass Spectrometry

GC/MS analysis was performed using an Agilent 7890A GC connected to an Agilent 5975C MS. 1  $\mu\text{L}$  of sample was injected at 270°C using helium as the carrier gas flowing at 1 mL/min. Split mode was used to avoid sample overloading. To separate the MOX-tBDMS derivatized polar metabolites the chromatography oven was held at 100°C for 2 minutes, increased to 255°C at 3.5°C/min, increased to 320°C at 15°C/min, and held at 320°C for 3 minutes. To separate FAMES the oven temperature was held at 100°C for 3 minutes, increased to 205°C at 25°C/min, increased to 230°C at 5°C/min, increased to 300°C at 25°C/min, and held at 300°C for 2 minutes. The MS operated in electron impact mode with the source and quadrupole held at 150°C and 230°C respectively and scanned over the range of 100-650  $m/z$  for methoxyamine-tBDMS derivatized polar metabolites and 100-350  $m/z$  for FAMES. Mass isotopomer distributions (MIDs) were determined by integrating ion fragments. When required, MIDs were corrected for natural abundances using an algorithm adapted from one described previously (Fernandez et al., 1996). Percent  $^{13}\text{C}$  enrichment was calculated from MIDs corrected for natural isotopic abundances as shown in Equation S7.

$$E = \frac{100\%}{n} \sum_{i=1}^{i=n} iM_i \quad (\text{S7})$$

where  $E$  is the percent  $^{13}\text{C}$  enrichment,  $i$  iterates the number of possible  $^{13}\text{C}$  labeled carbons on a metabolite fragment (one to the number of metabolite carbons),  $n$  is the number of metabolite carbons, and  $M_i$  is the relative abundance of the mass isotopomer containing  $i$   $^{13}\text{C}$  carbon atoms. The quantity “percent  $^{13}\text{C}$  labeled” is 100% minus the percent of a metabolite containing zero  $^{13}\text{C}$  carbon atoms. This calculation was also performed after correcting MIDs for natural isotopic abundances.

### **Proliferation Assay**

C2C12 myoblasts were plated 3000 cells per well in 96 well plates, one plate for each time point. After cells attached (time=0) and each day after plates were fixed with 4% paraformaldehyde and stored at 4°C in PBS. Total biomass over time was quantified by

measuring absorbance at 590 nm after staining using 0.9% crystal violet and re-dissolving with 4:1:1 (v:v:v) ethanol:methanol:water.

### **Preparation of BSA-[U-<sup>13</sup>C<sub>16</sub>]Palmitate Conjugates**

BSA-palmitate conjugates were prepared by dissolving sodium palmitate or [U-<sup>13</sup>C<sub>16</sub>]sodium palmitate (Cambridge Isotopes) to a concentration of 2.5 mM in 150 mM NaCl solution at 70°C. Using a glass pipette, 40 mL palmitate solution were added to 50 mL of 0.34 mM Ultra Fatty Acid Free BSA (Roche) solution at 37°C. A 1 mM working BSA-Palmitate conjugate solution was prepared by adjusting the pH to 7.4 and diluting to a final volume of 100 mL with 150 mM NaCl.

### **Gene Expression Analysis**

Isolation of mRNA from C2C12 myoblasts and myotubes was performed using a nucleic acid purification kit (NucleuSpin) per the manufacturer's instructions. The isolated mRNA was used to synthesize cDNA using a cDNA synthesis kit (Bio Rad) per the manufacturer's instructions. Quantitative polymerase chain reaction (qPCR) analysis was then performed using the Power SYBR Green PCR Master Mix (Applied Biosystems) per the manufacturer's instructions. Relative expression was quantified using the  $\Delta\Delta C_T$  method with  $\beta$ -actin as the endogenous control.

### **Western Blot Analysis**

Crude mitochondrial fractions from virally transduced cells were isolated as in (Divakaruni et al., 2013). Mitochondrial protein was solubilized and separated by SDS-PAGE on a Laemmli gel. Proteins were transferred to a PVDF membrane by semi-dry transfer (Bio-Rad), immunoblotted for either MPC1 (Abcam ab74871; 1:1000) or MPC2 (Sigma SAB4501091; 1:1000), and visualized by chemiluminescence (FluorChem E, ProteinSimple). After immunoblotting, the PDVF membrane was stripped, Coomassie-stained, and densitometry was measured *post-hoc* as a protein loading control.

### **Production of Stable Knockdown Myoblasts and Transformed Cells**



Lentival shRNA plasmids targeting mouse Mpc1 (NM\_018819.3-336s1c1: CCGGCAAAC GAAGTAGCTCAGCTCACTCGAGTGAGCTGAGCTACTTCGTTTGTTTTTT), mouse Mpc2 (NM\_027430.2-474s21c1:CCGGTTGGAGTTTGTTCGCTGTAACTCGAGTTAACAGCGAACA AACTCCAATTTTTG), human MPC1 (NM\_016098.1-619s1c1:CCGGGCTGCCTTACAAGTATT AAATCTCGAGATTTAATACTTGTAAGGCAGCTTTTT), or a non-targeting/scrambled control construct were packaged in 293T using Fugene 6 as a transfection agent for the desired pLKO vector, VSV-G, gag/pol, and rev. The 293T cell culture medium containing the lentiviral constructs was collected and filtered (0.45 µm) to remove any cells. Polybrene was added to a final concentration of 8 µg/mL. Cells in 6-well plates were cultured with 0.5 mL of the virus-containing medium for 4 hours before addition of 2 mL of virus free medium. Transduced cells were then selected with 2 µg/mL puromycin.

## SUPPLEMENTAL REFERENCES

Divakaruni, A.S., Wiley, S.E., Rogers, G.W., Andreyev, A.Y., Petrosyan, S., Loviscach, M., Wall, E.A., Yadava, N., Heuck, A.P., Ferrick, D.A., *et al.* (2013). Thiazolidinediones are acute, specific inhibitors of the mitochondrial pyruvate carrier. *Proc Natl Acad Sci U S A* *110*, 5422-5427.

Fernandez, C.A., Des Rosiers, C., Previs, S.F., David, F., and Brunengraber, H. (1996). Correction of <sup>13</sup>C mass isotopomer distributions for natural stable isotope abundance. *J Mass Spectrom* *31*, 255-262.

Grassian, A.R., Parker, S.J., Davidson, S.M., Divakaruni, A.S., Green, C.R., Zhang, X., Slocum, K.L., Pu, M., Lin, F., Vickers, C., *et al.* (2014). IDH1 mutations alter citric acid cycle metabolism and increase dependence on oxidative mitochondrial metabolism. *Cancer Res*.

Tritsch, G.L., and Moore, G.E. (1962). Spontaneous decomposition of glutamine in cell culture media. *Exp Cell Res* *28*, 360-364.
